# Supplementary material
Source: Research Square preprint supplement (doi:10.21203/rs.3.rs-9234239/v1)
Supplement: Supplementary file 1 [file fa936b93600675664af88a73.pdf]

## Definitions of local coordinate systems.

| Segment     | Origin | Base vector V                                                                                       | X-axis                                                                                  | Y-axis                              | Z-axis                 |                                                      |
|-------------|--------|-----------------------------------------------------------------------------------------------------|-----------------------------------------------------------------------------------------|-------------------------------------|------------------------|------------------------------------------------------|
| Pelvis      |        | Midpoint between anterior superior iliac spines & posterior superior iliac spines centers ( $O_P$ ) | $O_P$ to midpoint of left anterior superior iliac spines-posterior superior iliac spine | Cross product of V & Z              | Cross product of X & Z | $O_P$ to midpoint of posterior superior iliac spines |
| Trunk       |        | Midpoint between M1 (8th thoracic vertebra-xiphoid process) & $O_p$ ( $O_{Tr}$ )                    | 8th thoracic vertebra to xiphoid process                                                | M1 to $O_{Tr}$                      | Cross product of X & V | Cross product of X & Y                               |
| Right thigh |        | Midpoint between center of the hip joint & knee center ( $O_{Th}$ )                                 | lateral femoral epicondyle to medial femoral epicondyle                                 | $O_{Th}$ to center of the hip joint | Cross product of X & Z | Cross product of X & V                               |
| Right shank |        | Midpoint between knee & ankle centers ( $O_S$ )                                                     | Medial malleolus to lateral malleolus                                                   | $O_S$ to knee center                | Cross product of X & Z | Cross product of X & V                               |
| Right foot  |        | Midpoint between toe center & calcaneus ( $O_F$ )                                                   | $O_F$ to ankle center                                                                   | Cross product of Y & Z              | Cross product of V & Z | $O_F$ to calcaneus                                   |
